# Supplementary material for: PRDM9 forms a trimer by interactions within the zinc finger array
Source: Life Sci Alliance. 2019 Jul 15;2(4):e201800291. doi: 10.26508/lsa.201800291 (PMC6643046; doi:10.26508/lsa.201800291)
Supplement: Supplementary file 3 [file LSA-2018-00291_TableS2.xlsx]

## Sheet: Table S9 - raw data I
Table S2. Raw data of multimer assay I. In order to evaluate the multimer assay I experiments, each single EMSA, which was used to investigate one type of PRDM9 construct, was analysed individually. Therefore, the migration distances of the upper and lower reference bands (front usDNA 1, column 7; front usDNA 2, column 8; respectively) as well as the lower- and super-shift bands (front shift, col…
1	2	3	4	5	6	7	8	9	10	11	12	13	14	15	16	17	18
		DNA [bp]	MW [kDa]	ΔMW [kDa]	Log10 ∆MW	front usDNA1	front usDNA2	[A] front usDNA 2-1	front shift	[B] front shift - usDNA1	norm. front [A] - [B]	∆norm. front	Log10 ∆norm. front	Log10 ∆MW super-shift	∆MW super-shift	∆MW super- to lower-shift	#PRDM9
YFP-ZnFCst 1-11 #1
lower-shift	lane 1	75	49.5	0	-	0.17	0.8	0.63	0.62	0.45	0.18	0	-
	lane 2	114	75.24	25.74	1.41	0.18	0.81	0.63	0.58	0.4	0.23	0.05	-1.34
	lane 3	232	153.12	103.62	2.02	0.18	0.81	0.63	0.48	0.31	0.32	0.14	-0.86
	lane 4	352	232.32	182.82	2.26	0.18	0.81	0.63	0.45	0.28	0.35	0.17	-0.77	regression: y=0,5749x-2,0904
	lane 5	468	308.88	259.38	2.41	0.18	0.82	0.64	0.43	0.25	0.38	0.2	-0.7	R2=0,9817
	lane 6	740	488.4	438.9	2.64	0.18	0.82	0.64	0.35	0.17	0.47	0.28	-0.55
	lane 7	856	564.96	515.46	2.71	0.18	0.82	0.63	0.35	0.16	0.47	0.28	-0.55
	lane 8	1053	694.98	645.48	2.81	0.19	0.82	0.63	0.32	0.12	0.51	0.32	-0.49
	lane 9	1147	757.02	707.52	2.85	0.19	0.83	0.64	0.28	0.09	0.55	0.36	-0.44
	lane 10	1460	963.6	914.1	2.96	0.2	0.82	0.62	0.27	0.07	0.55	0.37	-0.43
super-shift	lane 2	114	75.24	25.74	1.41	0.18	0.81	0.63	0.41	0.23	0.4	0.22	-0.67	2.48	299.42	273.68	3.54
	lane 3	232	153.12	103.62	2.02	0.18	0.81	0.63	0.35	0.18	0.45	0.27	-0.57	2.64	441.42	337.8	4.36
	lane 4	352	232.32	182.82	2.26	0.18	0.81	0.63	0.33	0.15	0.48	0.29	-0.53	2.71	509.3	326.48	4.22
	lane 5	468	308.88	259.38	2.41	0.18	0.82	0.64	0.32	0.14	0.5	0.32	-0.5	2.76	581.27	321.89	4.16
YFP-ZnFCst 1-11 #2
lower-shift	lane 1	75	49.5	0	-	0.17	0.84	0.67	0.65	0.48	0.19	0	-
	lane 2	114	75.24	25.74	1.41	0.17	0.85	0.67	0.6	0.42	0.25	0.06	-1.2
	lane 3	232	153.12	103.62	2.02	0.17	0.85	0.67	0.5	0.33	0.35	0.16	-0.8
	lane 4	352	232.32	182.82	2.26	0.17	0.84	0.67	0.47	0.29	0.37	0.18	-0.74	regression: y=0,5073x-1,8831
	lane 5	468	308.88	259.38	2.41	0.17	0.83	0.66	0.44	0.26	0.4	0.21	-0.69	R2=0,9869
	lane 6	740	488.4	438.9	2.64	0.17	0.83	0.66	0.34	0.17	0.48	0.29	-0.53
	lane 7	856	564.96	515.46	2.71	0.16	0.83	0.67	0.33	0.17	0.5	0.31	-0.51
	lane 8	1053	694.98	645.48	2.81	0.15	0.82	0.67	0.28	0.13	0.54	0.35	-0.46
	lane 9	1147	757.02	707.52	2.85	0.14	0.81	0.67	0.24	0.1	0.57	0.38	-0.42
	lane 10	1460	963.6	914.1	2.96	0.13	0.79	0.65	0.21	0.07	0.58	0.39	-0.41
super-shift	lane 2	114	75.24	25.74	1.41	0.17	0.85	0.67	0.43	0.25	0.42	0.23	-0.64	2.45	284.72	258.98	3.35
	lane 3	232	153.12	103.62	2.02	0.17	0.85	0.67	0.37	0.2	0.48	0.29	-0.54	2.64	436.04	332.42	4.29
	lane 4	352	232.32	182.82	2.26	0.17	0.84	0.67	0.35	0.17	0.49	0.3	-0.52	2.69	485.08	302.26	3.91
	lane 5	468	308.88	259.38	2.41	0.17	0.83	0.66	0.33	0.16	0.5	0.31	-0.51	2.71	510.57	251.19	3.25
YFP-ZnFCst 1-11 #3
lower-shift	lane 1	75	49.5	0	-	0.081	0.856	0.775	0.631	0.55	0.225	0	-
	lane 2	114	75.24	25.74	1.41	0.09	0.86	0.77	0.54	0.45	0.32	0.1	-1
	lane 3	232	153.12	103.62	2.02	0.09	0.86	0.77	0.44	0.35	0.42	0.2	-0.7
	lane 4	352	232.32	182.82	2.26	0.1	0.87	0.77	0.42	0.32	0.45	0.23	-0.65	regression: y=0,4152x-1,5794
	lane 5	468	308.88	259.38	2.41	0.11	0.86	0.76	0.4	0.29	0.47	0.24	-0.61	R2=0,9903
	lane 6	740	488.4	438.9	2.64	0.11	0.86	0.76	0.31	0.2	0.56	0.33	-0.48
	lane 7	856	564.96	515.46	2.71	0.12	0.87	0.76	0.3	0.18	0.58	0.35	-0.45
	lane 8	1053	694.98	645.48	2.81	0.12	0.87	0.76	0.26	0.14	0.61	0.39	-0.41
	lane 9	1147	757.02	707.52	2.85	0.12	0.87	0.76	0.23	0.12	0.64	0.41	-0.38
	lane 10	1460	963.6	914.1	2.96	0.12	0.87	0.76	0.21	0.09	0.67	0.44	-0.36
super-shift	lane 2	114	75.24	25.74	1.41	0.09	0.86	0.77	0.38	0.29	0.49	0.26	-0.58	2.4	251.18	225.44	2.91
	lane 3	232	153.12	103.62	2.02	0.09	0.86	0.77	0.32	0.23	0.55	0.32	-0.49	2.63	422.82	319.2	4.12
	lane 4	352	232.32	182.82	2.26	0.1	0.87	0.77	0.3	0.2	0.58	0.35	-0.45	2.71	512.72	329.9	4.26
	lane 5	468	308.88	259.38	2.41	0.11	0.86	0.76	0.29	0.18	0.58	0.35	-0.45	2.71	512.72	253.34	3.27
YFP-ZnFCst 1-11 #4
lower-shift	lane 1	75	49.5	0	-	0.15	0.86	0.71	0.67	0.51	0.2	0	-
	lane 2	114	75.24	25.74	1.41	0.17	0.87	0.7	0.61	0.44	0.26	0.07	-1.19
	lane 3	232	153.12	103.62
	lane 4	352	232.32	182.82	2.26	0.16	0.85	0.68	0.46	0.3	0.38	0.19	-0.73
	lane 5	468	308.88	259.38	2.41	0.17	0.85	0.67	0.44	0.27	0.41	0.21	-0.67	regression: y=0,5141x-1,9032
	lane 6	740	488.4	438.9	2.64	0.17	0.85	0.67	0.34	0.17	0.5	0.31	-0.51	R2=0,9934
	lane 7	856	564.96	515.46	2.71	0.17	0.84	0.67	0.33	0.16	0.5	0.31	-0.51
	lane 8	1053	694.98	645.48	2.81	0.16	0.84	0.67	0.29	0.13	0.54	0.35	-0.46
	lane 9	1147	757.02	707.52	2.85	0.16	0.83	0.67	0.26	0.1	0.57	0.37	-0.43
	lane 10	1460	963.6	914.1	2.96	0.16	0.81	0.65	0.24	0.07	0.58	0.38	-0.42
super-shift	lane 2	114	75.24	25.74	1.41	0.17	0.87	0.7	0.44	0.27	0.43	0.24	-0.63	2.48	303.32	277.58	3.59
	lane 3	232	153.12	103.62
	lane 4	352	232.32	182.82	2.26	0.16	0.85	0.68	0.35	0.19	0.5	0.3	-0.52	2.69	487.23	304.41	3.93
	lane 5	468	308.88	259.38	2.41	0.17	0.85	0.67	0.33	0.16	0.51	0.32	-0.5	2.73	539.78	280.4	3.62
ZnFCst 1-11 #1
lower-shift	lane 1	75	49.5	0	-	0.17	0.86	0.69	0.75	0.58	0.11	0	-
	lane 2	114	75.24	25.74	1.41	0.19	0.87	0.68	0.72	0.52	0.15	0.05	-1.34
	lane 3	232	153.12	103.62	2.02	0.19	0.88	0.68	0.65	0.45	0.23	0.12	-0.91
	lane 4	352	232.32	182.82	2.26	0.19	0.88	0.69	0.61	0.42	0.28	0.17	-0.77	regression: y=0,6631x-2,2606
	lane 5	468	308.88	259.38	2.41	0.19	0.88	0.69	0.56	0.37	0.32	0.22	-0.67	R2=0,9959
	lane 6	740	488.4	438.9	2.64	0.22	0.89	0.68	0.45	0.23	0.45	0.34	-0.47
	lane 7	856	564.96	515.46	2.71	0.22	0.9	0.68	0.45	0.22	0.45	0.35	-0.46
	lane 8	1053	694.98	645.48	2.81	0.23	0.91	0.68	0.4	0.17	0.51	0.4	-0.4
	lane 9	1147	757.02	707.52	2.85	0.23	0.91	0.68	0.36	0.13	0.55	0.44	-0.36
	lane 10	1460	963.6	914.1	2.96	0.23	0.9	0.67	0.33	0.1	0.57	0.46	-0.34
super-shift	lane 2	114	75.24	25.74	1.41	0.19	0.87	0.68	0.56	0.37	0.31	0.2	-0.7	2.36	226.49	200.75	4
	lane 3	232	153.12	103.62	2.02	0.19	0.88	0.68	0.52	0.33	0.35	0.25	-0.61	2.49	309.77	206.15	4.11
	lane 4	352	232.32	182.82	2.26	0.19	0.88	0.69	0.51	0.32	0.38	0.27	-0.57	2.55	354.59	171.77	3.42
	lane 5	468	308.88	259.38	2.41	0.19	0.88	0.69	0.48	0.29	0.4	0.29	-0.53	2.6	401.41	142.03	2.83
ZnFCst 1-11 #2
lower-shift	lane 1	75	49.5	0	-	0.15	0.8	0.65	0.69	0.54	0.11	0	-
	lane 2	114	75.24	25.74	1.41	0.15	0.8	0.65	0.64	0.49	0.16	0.04	-1.35
	lane 3	232	153.12	103.62	2.02	0.16	0.81	0.65	0.58	0.43	0.22	0.11	-0.95
	lane 4	352	232.32	182.82	2.26	0.16	0.81	0.64	0.54	0.37	0.27	0.16	-0.8	regression: y=0,6439x-2,2545
	lane 5	468	308.88	259.38	2.41	0.16	0.81	0.66	0.51	0.36	0.3	0.19	-0.73	R2=0,9945
	lane 6	740	488.4	438.9	2.64	0.17	0.81	0.64	0.39	0.22	0.43	0.31	-0.5
	lane 7	856	564.96	515.46	2.71	0.18	0.81	0.63	0.38	0.2	0.43	0.32	-0.49
	lane 8	1053	694.98	645.48	2.81	0.19	0.81	0.63	0.34	0.16	0.47	0.36	-0.45
	lane 9	1147	757.02	707.52	2.85	0.19	0.81	0.62	0.32	0.13	0.49	0.38	-0.42
	lane 10	1460	963.6	914.1	2.96	0.2	0.83	0.63	0.3	0.1	0.53	0.42	-0.38
super-shift	lane 2	114	75.24	25.74	1.41	0.15	0.8	0.65	0.49	0.34	0.31	0.19	-0.71	2.4	248.52	222.78	4.44
	lane 3	232	153.12	103.62	2.02	0.16	0.81	0.65	0.47	0.31	0.34	0.22	-0.65	2.49	310.37	206.75	4.12
	lane 4	352	232.32	182.82	2.26	0.16	0.81	0.64	0.45	0.28	0.36	0.25	-0.61	2.56	359.88	177.06	3.53
	lane 5	468	308.88	259.38	2.41	0.16	0.81	0.66	0.43	0.27	0.39	0.28	-0.56	2.63	429.86	170.48	3.4
ZnFCst 1-11 #3
lower-shift	lane 1	75	49.5	0	-	0.17	0.89	0.72	0.78	0.61	0.1	0	-
	lane 2	114	75.24	25.74	1.41	0.19	0.9	0.7	0.74	0.55	0.15	0.05	-1.32
	lane 3	232	153.12	103.62	2.02	0.21	0.91	0.7	0.68	0.47	0.23	0.13	-0.89
	lane 4	352	232.32	182.82	2.26	0.22	0.91	0.69	0.63	0.41	0.28	0.18	-0.75	regression: y=0,6571x-2,2292
	lane 5	468	308.88	259.38	2.41	0.23	0.91	0.69	0.58	0.35	0.33	0.23	-0.65	R2=0,9961
	lane 6	740	488.4	438.9	2.64	0.23	0.91	0.69	0.46	0.23	0.45	0.35	-0.46
	lane 7	856	564.96	515.46	2.71	0.23	0.91	0.69	0.44	0.22	0.47	0.36	-0.44
	lane 8	1053	694.98	645.48	2.81	0.23	0.91	0.69	0.4	0.17	0.52	0.41	-0.39
	lane 9	1147	757.02	707.52	2.85	0.22	0.9	0.69	0.35	0.13	0.56	0.45	-0.35
	lane 10	1460	963.6	914.1	2.96	0.22	0.9	0.69	0.32	0.1	0.58	0.48	-0.32
super-shift	lane 2	114	75.24	25.74	1.41	0.19	0.9	0.7	0.59	0.4	0.31	0.2	-0.7	2.33	215.81	190.07	3.79
	lane 3	232	153.12	103.62	2.02	0.21	0.91	0.7	0.56	0.35	0.35	0.25	-0.6	2.48	299.39	195.77	3.9
	lane 4	352	232.32	182.82	2.26	0.22	0.91	0.69	0.53	0.31	0.38	0.27	-0.56	2.54	344.58	161.76	3.22
	lane 5	468	308.88	259.38	2.41	0.23	0.91	0.69	0.51	0.28	0.4	0.3	-0.53	2.59	391.9	132.52	2.64
YFP-ZnFCst #1
lower-shift	lane 1	75	49.5	0	-	0.17	0.85	0.68	0.61	0.45	0.24	0	-
	lane 2	114	75.24	25.74	1.41	0.16	0.85	0.69	0.54	0.38	0.31	0.08	-1.12
	lane 3	232	153.12	103.62	2.02	0.18	0.86	0.68	0.48	0.3	0.38	0.14	-0.85
	lane 4	352	232.32	182.82	2.26	0.18	0.87	0.69	0.44	0.26	0.43	0.19	-0.71	regression: y=0,4477x-1,7452
	lane 5	468	308.88	259.38	2.41	0.18	0.86	0.68	0.41	0.24	0.45	0.21	-0.68	R2=0,9944
	lane 6	740	488.4	438.9	2.64	0.18	0.86	0.68	0.34	0.16	0.52	0.29	-0.54
	lane 7	856	564.96	515.46	2.71	0.16	0.85	0.69	0.32	0.16	0.53	0.29	-0.53
	lane 8	1053	694.98	645.48	2.81	0.16	0.84	0.68	0.27	0.11	0.57	0.34	-0.47
	lane 9	1147	757.02	707.52	2.85	0.16	0.82	0.66	0.24	0.08	0.58	0.34	-0.46
	lane 10	1460	963.6	914.1	2.96	0.16	0.82	0.66	0.23	0.07	0.59	0.35	-0.45
super-shift	lane 2	114	75.24	25.74	1.41	0.16	0.85	0.69	0.39	0.24	0.45	0.22	-0.66	2.42	264.64	238.9	2.87
	lane 3	232	153.12	103.62	2.02	0.18	0.86	0.68	0.34	0.17	0.51	0.28	-0.56	2.65	450.75	347.13	4.17
	lane 4	352	232.32	182.82	2.26	0.18	0.87	0.69	0.34	0.16	0.53	0.29	-0.53	2.71	514.06	331.24	3.98
	lane 5	468	308.88	259.38	2.41	0.18	0.86	0.68	0.32	0.14	0.54	0.3	-0.52	2.74	547.45	288.07	3.46
ZnFCst #1
lower-shift	lane 1	75	49.5	0	-	0.17	0.8	0.63	0.66	0.49	0.14	0	-
	lane 2	114	75.24	25.74	1.41	0.18	0.8	0.62	0.63	0.45	0.17	0.03	-1.51
	lane 3	232	153.12	103.62	2.02	0.18	0.81	0.62	0.56	0.38	0.25	0.11	-0.97
	lane 4	352	232.32	182.82	2.26	0.18	0.81	0.62	0.52	0.34	0.28	0.15	-0.84	regression: y=0,7179-2,4766
	lane 5	468	308.88	259.38	2.41	0.19	0.81	0.62	0.49	0.3	0.32	0.18	-0.75	R2=0,9901
	lane 6	740	488.4	438.9	2.64	0.19	0.82	0.62	0.39	0.2	0.42	0.28	-0.55
	lane 7	856	564.96	515.46	2.71	0.18	0.81	0.62	0.38	0.19	0.43	0.29	-0.53
	lane 8	1053	694.98	645.48	2.81	0.18	0.81	0.62	0.33	0.15	0.48	0.34	-0.47
	lane 9	1147	757.02	707.52	2.85	0.18	0.8	0.62	0.28	0.11	0.52	0.38	-0.42
	lane 10	1460	963.6	914.1	2.96	0.18	0.8	0.62	0.26	0.08	0.54	0.4	-0.4
super-shift	lane 2	114	75.24	25.74	1.41	0.18	0.8	0.62	0.49	0.32	0.31	0.17	-0.77	2.38	237.19	211.45	3.83
	lane 3	232	153.12	103.62	2.02	0.18	0.81	0.62	0.45	0.27	0.35	0.22	-0.67	2.52	331.88	228.26	4.14
	lane 4	352	232.32	182.82	2.26	0.18	0.81	0.62	0.44	0.25	0.37	0.23	-0.64	2.56	365.36	182.54	3.31
	lane 5	468	308.88	259.38	2.41	0.19	0.81	0.62	0.42	0.22	0.39	0.25	-0.6	2.62	417.23	157.85	2.86
YFP-ZnFCst 2-11 #1
lower-shift	lane 1	75	49.5	0	-	0.16	0.76	0.6	0.66	0.5	0.1	0	-
	lane 2	114	75.24	25.74	1.41	0.16	0.77	0.6	0.62	0.46	0.15	0.05	-1.33
	lane 3	232	153.12	103.62	2.02	0.17	0.78	0.6	0.55	0.38	0.22	0.12	-0.91
	lane 4	352	232.32	182.82	2.26	0.17	0.78	0.6	0.51	0.34	0.26	0.16	-0.79	regression: y=0,6201-2,1863
	lane 5	468	308.88	259.38	2.41	0.17	0.78	0.6	0.47	0.3	0.3	0.2	-0.7	R2=0,9952
	lane 6	740	488.4	438.9	2.64	0.16	0.77	0.6	0.36	0.2	0.4	0.3	-0.52
	lane 7	856	564.96	515.46	2.71	0.16	0.77	0.6	0.35	0.19	0.42	0.32	-0.5
	lane 8	1053	694.98	645.48	2.81	0.16	0.76	0.6	0.3	0.14	0.46	0.36	-0.45
	lane 9	1147	757.02	707.52	2.85	0.16	0.75	0.6	0.26	0.11	0.49	0.39	-0.41
	lane 10	1460	963.6	914.1	2.96	0.15	0.74	0.6	0.23	0.09	0.51	0.41	-0.39
super-shift	lane 2	114	75.24	25.74	1.41	0.16	0.77	0.6	0.49	0.33	0.28	0.18	-0.75	2.32	208.01	182.27	2.95
	lane 3	232	153.12	103.62	2.02	0.17	0.78	0.6	0.44	0.27	0.33	0.23	-0.63	2.5	319.28	215.66	3.5
	lane 4	352	232.32	182.82	2.26	0.17	0.78	0.6	0.43	0.26	0.35	0.25	-0.61	2.55	354.29	171.47	2.78
	lane 5	468	308.88	259.38	2.41	0.17	0.78	0.6	0.4	0.23	0.37	0.27	-0.57	2.61	409.38	150	2.43
YFP-ZnFCst 2-11 #2
lower-shift	lane 1	75	49.5	0	-	0.13	0.74	0.6	0.64	0.5	0.1	0	-
	lane 2	114	75.24	25.74	1.41	0.14	0.74	0.6	0.6	0.46	0.15	0.05	-1.33
	lane 3	232	153.12	103.62	2.02	0.16	0.75	0.6	0.53	0.38	0.22	0.12	-0.93
	lane 4	352	232.32	182.82	2.26	0.16	0.75	0.6	0.5	0.34	0.26	0.16	-0.81	regression: y=0,628-2,2146
	lane 5	468	308.88	259.38	2.41	0.16	0.76	0.6	0.47	0.3	0.29	0.19	-0.71	R2=0,9961
	lane 6	740	488.4	438.9	2.64	0.16	0.76	0.6	0.36	0.2	0.4	0.3	-0.52
	lane 7	856	564.96	515.46	2.71	0.16	0.75	0.6	0.35	0.19	0.4	0.3	-0.52
	lane 8	1053	694.98	645.48	2.81	0.16	0.75	0.6	0.3	0.15	0.45	0.35	-0.46
	lane 9	1147	757.02	707.52	2.85	0.15	0.75	0.6	0.26	0.11	0.5	0.4	-0.4
	lane 10	1460	963.6	914.1	2.96	0.15	0.74	0.6	0.22	0.08	0.52	0.42	-0.38
super-shift	lane 2	114	75.24	25.74	1.41	0.14	0.74	0.6	0.47	0.33	0.27	0.17	-0.77	2.3	201.02	175.28	2.84
	lane 3	232	153.12	103.62	2.02	0.16	0.75	0.6	0.43	0.27	0.33	0.22	-0.65	2.49	312.09	208.47	3.38
	lane 4	352	232.32	182.82	2.26	0.16	0.75	0.6	0.42	0.26	0.33	0.23	-0.63	2.52	329.4	146.58	2.38
	lane 5	468	308.88	259.38	2.41	0.16	0.76	0.6	0.4	0.23	0.36	0.26	-0.58	2.6	402.05	142.67	2.31
YFP-ZnFCst 2-11 #3
lower-shift	lane 1	75	49.5	0	-	0.15	0.8	0.65	0.72	0.57	0.08	0	-
	lane 2	114	75.24	25.74	1.41	0.16	0.81	0.65	0.67	0.51	0.14	0.06	-1.2
	lane 3	232	153.12	103.62	2.02	0.16	0.82	0.66	0.58	0.42	0.24	0.16	-0.8
	lane 4	352	232.32	182.82	2.26	0.16	0.83	0.67	0.54	0.38	0.29	0.21	-0.69	regression: y=0,5938x-2,0196
	lane 5	468	308.88	259.38	2.41	0.16	0.84	0.68	0.51	0.35	0.33	0.25	-0.6	R2=0,9946
	lane 6	740	488.4	438.9	2.64	0.17	0.85	0.68	0.39	0.22	0.46	0.38	-0.42
	lane 7	856	564.96	515.46	2.71	0.17	0.85	0.68	0.37	0.21	0.48	0.4	-0.4
	lane 8	1053	694.98	645.48	2.81	0.17	0.85	0.68	0.33	0.16	0.52	0.44	-0.35
	lane 9	1147	757.02	707.52	2.85	0.17	0.85	0.68	0.29	0.12	0.56	0.48	-0.32
	lane 10	1460	963.6	914.1	2.96	0.16	0.83	0.67	0.25	0.1	0.58	0.5	-0.3
super-shift	lane 2	114	75.24	25.74	1.41	0.16	0.81	0.65	0.53	0.37	0.28	0.2	-0.7	2.22	165.27	139.53	2.26
	lane 3	232	153.12	103.62	2.02	0.16	0.82	0.66	0.48	0.32	0.34	0.26	-0.58	2.42	263.79	160.17	2.6
	lane 4	352	232.32	182.82	2.26	0.16	0.83	0.67	0.45	0.29	0.37	0.29	-0.53	2.5	319.84	137.02	2.22
	lane 5	468	308.88	259.38	2.41	0.16	0.84	0.68	0.43	0.27	0.41	0.33	-0.48	2.6	395.95	136.57	2.21
YFP-ZnFCst 2-11 #4
lower-shift	lane 1	75	49.5	0	-	0.08	0.86	0.77	0.76	0.68	0.1	0	-
	lane 2	114	75.24	25.74	1.41	0.08	0.86	0.78	0.68	0.59	0.19	0.09	-1.05
	lane 3	232	153.12	103.62	2.02	0.07	0.86	0.79	0.56	0.49	0.31	0.21	-0.68
	lane 4	352	232.32	182.82	2.26	0.08	0.86	0.78	0.51	0.43	0.35	0.25	-0.6	regression: y=0,5136x-1,7549
	lane 5	468	308.88	259.38	2.41	0.08	0.86	0.78	0.48	0.4	0.39	0.29	-0.54	R2=0,9932
	lane 6	740	488.4	438.9	2.64	0.09	0.87	0.78	0.35	0.26	0.52	0.42	-0.37
	lane 7	856	564.96	515.46	2.71	0.09	0.86	0.77	0.34	0.25	0.52	0.42	-0.37
	lane 8	1053	694.98	645.48	2.81	0.09	0.86	0.77	0.28	0.19	0.59	0.49	-0.31
	lane 9	1147	757.02	707.52	2.85	0.09	0.86	0.77	0.23	0.14	0.63	0.53	-0.27
	lane 10	1460	963.6	914.1	2.96	0.08	0.85	0.77	0.19	0.11	0.66	0.56	-0.25
super-shift	lane 2	114	75.24	25.74	1.41	0.08	0.86	0.78	0.51	0.43	0.35	0.25	-0.6	2.25	178.73	152.99	2.48
	lane 3	232	153.12	103.62	2.02	0.07	0.86	0.79	0.43	0.36	0.43	0.33	-0.48	2.49	307.53	203.91	3.3
	lane 4	352	232.32	182.82	2.26	0.08	0.86	0.78	0.41	0.32	0.46	0.36	-0.44	2.55	357.94	175.12	2.84
	lane 5	468	308.88	259.38	2.41	0.08	0.86	0.78	0.39	0.31	0.48	0.38	-0.42	2.6	393.61	134.23	2.18
ZnFCst 2-8 #1
lower-shift	lane 2	75	49.5	0	-	0.1	0.83	0.73	0.66	0.56	0.17	0	-
	lane 4	114	75.24	25.74	1.41	0.09	0.81	0.72	0.59	0.5	0.22	0.05	-1.27	regression: y=0,6703x-2,2017
	lane 6	232	153.12	103.62	2.02	0.11	0.82	0.71	0.5	0.39	0.32	0.15	-0.82	R2=0,9966
	lane 8	543	358.38	308.88	2.49	0.12	0.82	0.71	0.37	0.25	0.46	0.29	-0.54
	lane 10	740	488.4	438.9	2.64	0.13	0.84	0.71	0.3	0.18	0.54	0.37	-0.44
super-shift	lane 4	114	75.24	25.74	1.41	0.09	0.81	0.72	0.5	0.41	0.31	0.14	-0.85	1.97	93.42	67.68	2.56
	lane 6	232	153.12	103.62	2.02	0.11	0.82	0.71	0.45	0.34	0.38	0.21	-0.69	2.21	162.91	59.29	2.25
ZnFCst 2-8 #2
lower-shift	lane 2	75	49.5	0	-	0.11	0.81	0.71	0.66	0.55	0.15	0	-
	lane 4	114	75.24	25.74	1.41	0.11	0.82	0.71	0.62	0.5	0.2	0.05	-1.31	regression: y=0,7215x-2,3236
	lane 6	232	153.12	103.62	2.02	0.12	0.82	0.7	0.53	0.41	0.29	0.14	-0.86	R2=0,9994
	lane 8	543	358.38	308.88	2.49	0.15	0.84	0.69	0.38	0.24	0.46	0.3	-0.52
	lane 10	740	488.4	438.9	2.64	0.15	0.83	0.67	0.3	0.15	0.53	0.37	-0.43
super-shift	lane 4	114	75.24	25.74	1.41	0.11	0.82	0.71	0.52	0.41	0.3	0.15	-0.83	2.06	115.8	90.06	3.41
	lane 6	232	153.12	103.62	2.02	0.12	0.82	0.7	0.46	0.34	0.36	0.2	-0.69	2.26	182.58	78.96	2.99
ZnFCst 2-8 #3
lower-shift	lane 2	75	49.5	0	-	0.17	0.85	0.68	0.7	0.53	0.15	0	-
	lane 4	114	75.24	25.74	1.41	0.19	0.85	0.66	0.64	0.45	0.21	0.06	-1.22	regression: y=0,6317x-2,1219
	lane 6	232	153.12	103.62	2.02	0.2	0.85	0.65	0.56	0.37	0.28	0.14	-0.86	R2=0,999
	lane 8	543	358.38	308.88	2.49	0.2	0.85	0.65	0.42	0.22	0.43	0.28	-0.55
	lane 10	740	488.4	438.9	2.64	0.21	0.85	0.65	0.35	0.15	0.5	0.36	-0.44
super-shift	lane 4	114	75.24	25.74	1.41	0.19	0.85	0.66	0.56	0.38	0.28	0.14	-0.86	1.99	97.99	72.25	2.74
	lane 6	232	153.12	103.62	2.02	0.2	0.85	0.65	0.51	0.32	0.33	0.19	-0.73	2.21	162.23	58.61	2.22
ZnFCst 2-6 #1
lower-shift	lane 2	75	49.5	0	-	0.08	0.8	0.72	0.65	0.57	0.15	0	-
	lane 4	114	75.24	25.74	1.41	0.1	0.8	0.71	0.61	0.51	0.2	0.04	-1.35	regression: y=0,7882x-2,4527
	lane 6	232	153.12	103.62	2.02	0.11	0.81	0.71	0.52	0.41	0.29	0.14	-0.85	R2=0,9991
	lane 8	543	358.38	308.88	2.49	0.1	0.82	0.72	0.35	0.25	0.47	0.32	-0.49
	lane 10	740	488.4	438.9	2.64	0.1	0.84	0.74	0.27	0.17	0.57	0.42	-0.38
super-shift	lane 4	114	75.24	25.74	1.41	0.1	0.8	0.71	0.53	0.43	0.28	0.13	-0.9	1.97	92.47	66.73	3.26
	lane 6	232	153.12	103.62	2.02	0.11	0.81	0.71	0.47	0.37	0.34	0.19	-0.73	2.19	154.68	51.06	2.49
ZnFCst 2-6 #2
lower-shift	lane 2	75	49.5	0	-	0.14	0.82	0.68	0.67	0.53	0.15	0	-
	lane 4	114	75.24	25.74	1.41	0.14	0.84	0.7	0.63	0.49	0.21	0.06	-1.24	regression: y=0,682x-2,1917
	lane 6	232	153.12	103.62	2.02	0.13	0.84	0.71	0.52	0.39	0.32	0.16	-0.79	R2=0,9967
	lane 8	543	358.38	308.88	2.49	0.15	0.86	0.72	0.38	0.24	0.48	0.33	-0.49
	lane 10	740	488.4	438.9	2.64	0.15	0.86	0.72	0.32	0.17	0.54	0.39	-0.41
super-shift	lane 4	114	75.24	25.74	1.41	0.14	0.84	0.7	0.55	0.41	0.28	0.13	-0.89	1.91	82.19	56.45	2.75
	lane 6	232	153.12	103.62	2.02	0.13	0.84	0.71	0.48	0.35	0.36	0.2	-0.69	2.2	158.13	54.51	2.66
ZnFCst 2-6 #3
lower-shift	lane 2	75	49.5	0	-	0.13	0.81	0.68	0.67	0.54	0.15	0	-
	lane 4	114	75.24	25.74	1.41	0.13	0.81	0.68	0.62	0.49	0.2	0.05	-1.29	regression: y=0,6984x-2,2573
	lane 6	232	153.12	103.62	2.02	0.12	0.8	0.68	0.5	0.38	0.3	0.15	-0.81	R2=0,9959
	lane 8	543	358.38	308.88	2.49	0.13	0.81	0.68	0.37	0.24	0.44	0.3	-0.52
	lane 10	740	488.4	438.9	2.64	0.15	0.83	0.68	0.31	0.16	0.52	0.38	-0.42
super-shift	lane 4	114	75.24	25.74	1.41	0.13	0.81	0.68	0.54	0.41	0.27	0.13	-0.89	1.95	90.11	64.37	3.14
	lane 6	232	153.12	103.62	2.02	0.12	0.8	0.68	0.46	0.34	0.34	0.2	-0.71	2.22	166.18	62.56	3.05
