# Supplementary material for: PRDM9 forms a trimer by interactions within the zinc finger array
Source: Life Sci Alliance. 2019 Jul 15;2(4):e201800291. doi: 10.26508/lsa.201800291 (PMC6643046; doi:10.26508/lsa.201800291)
Supplement: Supplementary file 6 [file LSA-2018-00291_TableS5.xlsx]

## Sheet: Sheet1
Table S5. Summary of values extracted from the FCS raw data and single component fits (Eq. 1) to the autocorrelation curves (Fig. S6). 〈I〉 – overall intensity of the sample; G(0) - height of the shoulder of G(τ) at τ = 0; 〈N〉 – average number of fluorescent particles in the focal volume; Iunit = 〈I〉⁄〈N〉 – brightness of single fluorescent particles; τd – average diffusion time it takes the fluores…
	#	〈I〉 [kHz]	G(0)	〈N〉	Iunit [kHz]	τd [µs]
Halo-eYFP-ZnFCst 1-11	1	3.17	3.87597	0.258	12.296	105.798
	2	2.92	4.13223	0.242	12.076	89.424
	3	8.688	3.38983	0.295	29.404	102.726
	4	4.9177	2.38834	0.4187	12.0237	166.321
	5	3.596	2.80899	0.356	10.111	136.221
Halo-eYFP-ZnFCst 1-11 + urea	1	9.437	1.0101	0.99	9.533	121.016
	2	8.291	1.20627	0.829	10.003	112.656
	3	8.995	1.01215	0.988	9.101	120.89
	4	13.19	0.808604	1.2367	10.655	193.813
	5	9.219	0.890472	1.123	8.205	139.034
eYFP	1	3.065	4.38596	0.228	13.452	115.626
	2	3.421	4.25532	0.235	14.584	111.482
	3	2.963	4.36681	0.229	12.942	111.027
eYFP + urea	1	3.081	2.97619	0.336	9.159	100.062
	2	3.106	3.46021	0.289	10.74	98.788
	3	2.851	2.47525	0.404	7.048	97.822
