# Supplementary material for: PRDM9 forms a trimer by interactions within the zinc finger array
Source: Life Sci Alliance. 2019 Jul 15;2(4):e201800291. doi: 10.26508/lsa.201800291 (PMC6643046; doi:10.26508/lsa.201800291)
Supplement: Supplementary file 8 [file LSA-2018-00291_TableS7.xlsx]

## Sheet: Sheet1
Table S7. Mass list of MS/MS spectra of four prominent m/z peaks. Shown is the mass list of MS/MS data of the four prominent peaks 1338.61, 1767.84, 1810.76, and 1908.01 detected by PMF. Calculated m/z values (m/z exp.) were compared with measured values (Δ exp./obs.) of corresponding amino acid sequences (AA). Y-ion series as well as matching b and a ions are shown (ion type).
1338.61					1767.84
	m/z exp.	Δ exp./obs.	ion type	AA		m/z exp.	Δ exp./obs.	ion type	AA
112.4			R		175.69	175.119	-0.571	y1	R
129.57					227.5	227.103	-0.3974	b2	EP
157.77	158.092	0.3224	y1-NH3	R	374.46	374.171	-0.289	b3	EPF
175.4	175.119	-0.281	y1	R	426.38			i
235.22	235.108	-0.1123	b2	SF	451.35			i
270.46			i		538.53
288.08			i		544.62
304.34	304.161	-0.1785	y2	RE	571.51	571.335	-0.1749	y4	RWLP
348.39	348.192	-0.1982	b3	SFI	580.42			i
401.14	401.218	0.0783	b4-H2O	SFIA	601.84	601.298	-0.542	b5	EPFLN
419.43	419.229	-0.2011	b4	SFIA	700.4	700.377	-0.023	y5	RWLPE
488.51	488.25	-0.2596	b5-H2O	SFIAS	814.5			i
504.3	504.278	-0.0224	y4	REIS	839.96	839.452	-0.5078	y6-NH3	RWLPER
591.32	591.31	-0.0103	y5	REISS	856.37	856.479	0.1088	y6	RWLPER
617.44	617.293	-0.147	b6-H2O	SFIASE	937.56
635.19	635.303	0.1135	b6	SFIASE	954.49	954.479	-0.0108	y7-NH3	RWLPERD
687.74	687.367	-0.3728	y6-NH3	REISSI	972.04	971.506	-0.5343	y7	RWLPERD
704.29	704.394	0.1037	y6	REISSI	1011.88
748.74	748.388	-0.3524	b7	SFIASEI	1040.96	1040.55	-0.4076	a9	EPFLNPVDR
834.75	833.436	-1.3137	y7	REISSIE	1068.62	1068.55	-0.0727	b9	EPFLNPVDR
	835.42	0.6696	b8	SFIASEIS	1109.27
886.84					1151.88	1151.58	-0.2956	a10-H2O	EPFLNPVDRE
903.99	903.442	-0.5482	y8-NH3	REISSIE	1169.29	1169.59	0.3049	a10	EPFLNPVDRE
921.14	920.468	-0.6716	y8	REISSIES	1197.35	1197.59	0.2399	b10	EPFLNPVDRE
	922.452	1.3116	b9	SFIASEISS	1249.17	1249.62	0.4512	a11-NH3	EPFLNPVDREP
991.42	991.505	0.0855	y9	REISSIESA	1264.63	1264.64	0.0133	y10-NH3	RWLPERDVPN
1105.24	1104.59	-0.6505	y10	REISSIESAI	1281.65	1281.67	0.0198	y10	RWLPERDVPN
1242.06					1379.85	1379.73	-0.1182	a12	EPFLNPVDREPL
1309.07					1407.15	1407.73	0.5767	b12	EPFLNPVDREPL
1321.16			MH-NH3		1426.25	1425.74	-0.5127	b12+H2O	EPFLNPVDREPL
					1483.1
					1542.45	1541.82	-0.6277	y12	RWLPERDVPNLF
					1566.4	1565.81	-0.5889	a13	EPFLNPVDREPLW
					1594.33	1593.81	-0.524	b13	EPFLNPVDREPLW
					1613.07
					1623.33
					1640.21	1638.88	-1.3349	y13	RWLPERDVPNLFP
					1709.25
					1727.04
					1734.58
					1751.68			MH-NH3
1810.76					1908.01
	m/z exp.	Δ exp./obs.	ion type	AA		m/z exp.	Δ exp./obs.	ion type	AA
175.4	175.119	-0.281	y1/a2	R	175.26	175.119	-0.141	y1	R
274.22	274.187	-0.0326	y2	RV	227.28	227.175	-0.1046	b2	LL
383.26	383.192	-0.0675	a4-NH3	SDKP	246.14	246.156	0.0161	y2	RA
394.5	394.22	-0.2803	y3-NH3	RVH	254.16			i
411.25	411.246	-0.0037	y3	RVH	317.04	317.193	0.1532	y3	RAA
526.07	526.273	0.2032	y4	RVHD	367.09			i
624.39	624.274	-0.1164	y5-NH3	RVHDD	374.66	374.244	-0.4162	b3	LLF
641.31	641.3	-0.0098	y5	RVHDD	395.22			i
771.02	771.342	0.322	y6-NH3	RVHDDF	479.84			i
787.94	788.369	0.4286	y6	RVHDDF	554.61
876.35	876.41	0.0598	b8	SDKPDLGY	668.89
917.62	917.426	-0.1936	y7-H2O	RVHDDFF	693.88	693.368	-0.5122	y7-H2O	RAAEAPP
935.34	935.437	0.097	y7	RVHDDFF	710.92	711.378	0.4584	y7	RAAEAPP
1097.94	1098.5	0.5603	y8	RVHDDFFY	718.38	718.392	0.0123	b6	LLFWGT
1138.3	1138.5	0.1952	y9-NH3	RVHDDFFYG	806.76	806.452	-0.3081	y8-H2O	RAAEAPPI
1155.33	1155.52	0.1918	y9	RVHDDFFYG	824.28	824.462	0.1825	y8	RAAEAPPI
1251.2	1251.58	0.3793	y10-NH3	RVHDDFFYGL	857.41
1267.95	1268.61	0.6558	y10	RVHDDFFYGL	872.17	872.466	0.2965	b8	LLFWGTPG
1347.6					937.19	937.547	0.3565	y9	RAAEAPPIL
1366.05	1366.61	0.5562	y11-NH3	RVHDDFFYGLD	971.09	971.535	0.4449	b9	LLFWGTPGV
1399.78	1400.6	0.8205	b12	RVHD	1036.53	1036.62	0.085	y10	RAAEAPPILV
1462.87	1462.67	-0.195	y12-H2O	RVHDDFFYGLDP	1084.2	1084.62	0.419	b10	LLFWGTPGVL
1480.02	1480.69	0.6656	y12	RVHDDFFYGLDP	1173	1173.66	0.6626	y12-NH3	RAAEAPPILVGP
1537.55	1537.66	0.1094	b13	RHV	1190.24	1190.69	0.4492	y12	RAAEAPPILVGP
1608.18	1608.78	0.6005	a14/y13	RVHDDFFYGLDPK	1273.09	1273.73	0.6363	y13-H2O	RAAEAPPILVGPT
1636.71	1636.73	0.0178	b14	RV	1292.31	1291.74	-0.5731	y13	RAAEAPPILVGPT
1653.62	1654.74	1.1184	b14+H2O	RV	1348.37	1348.76	0.3883	y14	RAAEAPPILVGPTG
1793.58					1534.73	1534.84	0.1076	y15	RAAEAPPILVGPTGW
					1639.47
					1682.35	1681.91	-0.4439	y16	RAAEAPPILVGPTGWF
					1758.57
					1797.08
					1864.84
